# Supplementary material for: Demonstration of 10+ hour energy storage with ϕ1′′ laboratory size solid oxide iron–air batteries
Source: Royal Society of Chemistry journal article supplement (doi:10.1039/d2ee01626e), 2022-01-01
Supplement: d2ee01626e1.pdf [file d2ee01626e1.pdf]

## Supporting Information

### Demonstration of 10+ Hour Energy Storage with $\phi 1''$ Laboratory Size Solid Oxide Iron-Air batteries

Qiming Tang<sup>1</sup>, Yongliang Zhang<sup>1</sup>, Nansheng Xu<sup>1</sup>, Xueling Lei<sup>2\*</sup> and Kevin Huang<sup>1\*</sup>

<sup>1</sup>Department of Mechanical Engineering, University of South Carolina, Columbia, SC 29201, USA

<sup>2</sup>Department of Physics, Jiangxi Normal University, Nanchang, Jiangxi 330022, China

\*Corresponding author: e-mail: [huang46@cec.sc.edu](mailto:huang46@cec.sc.edu); e-mail: [xueling@mail.ustc.edu.cn](mailto:xueling@mail.ustc.edu.cn)

#### Thermodynamic aspects of SOIAB

We here show how to calculate thermodynamic properties of Fe-O system. At 550 °C, the equilibrium between Fe and O<sub>2</sub> in SOIAB is given by <sup>[1]</sup>

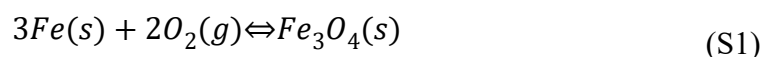

The theoretical Nernst potential ( $E_N$ ) related to this reaction is determined by:

$$E_N = E^o - \frac{RT}{nF} \ln \left( \frac{1}{[pO_2]^2} \right) \quad (S2)$$

where  $E^o = -\frac{\Delta G^0}{nF}$ , which refers to the EMF under the standard state;  $\Delta G^0$  is the standard Gibbs free energy change of Fe-Fe<sub>3</sub>O<sub>4</sub> at 550 °C; R is the universal gas constant, 8.314 J mol<sup>-1</sup> K<sup>-1</sup>; T is the temperature in kelvins;  $n$  is the number of electrons transferred in the reaction per mole metal,  $n = 8$  for this case; and F is the Faraday constant, 96485 C mol<sup>-1</sup>;  $pO_2$  is the partial pressure of oxygen, 0.21 atm in air.

The theoretical specific energy (SE\*, based on the mass of iron element, Wh kg<sup>-1</sup>) can be

calculated by:

$$SE^* (Wh\ kg^{-1}) = \frac{Q^* \times E_N}{m_{Fe}(kg)} = \frac{nF \times E_N}{3600 \times M_{Fe} \times 0.001} \quad (S3)$$

where  $Q^* = n \times F = I \times t(seconds)$ , which refers to the total theoretical charge per mole of Fe;  $M_{Fe}$  is the molar mass of Fe in  $g\ mol^{-1}$ .

The theoretical specific charge capacity ( $Q^*$ , based on the mass of Fe,  $Ah\ kg^{-1}$ ) can be obtained by:

$$Q^* (Ah\ kg^{-1}) = \frac{SE^*}{E_N} \quad (S4)$$

The practical specific energy (PSE, or denoted as DSE and CSE in the main text) is determined by the following:

$$PSE (Wh\ Kg^{-1}) = \frac{\int_{t_1}^{t_2} (I \times V) dt}{m_{Fe}(kg)} \quad (S5)$$

where,  $t_1$  and  $t_2$  refers to the duration of charging or discharging, respectively;  $I$  is the applied current;  $V$  is the actual measured potential. Thus, the round trip efficient (RTE, %) can be calculated by:

$$RTE = \frac{SE_d}{SE_c} = \frac{\int_{t_1}^{t_2} (I_d \times V_d) dt}{\int_{t_1}^{t_2} (I_c \times V_c) dt} \times 100\% \quad (S6)$$

The subscripts “c and “d” refer to “charge” and “discharge”, respectively.

The C-rate, describing how fast a battery charges and discharges, can be expressed by the

applied current. For example, a 1C battery needs one hour to charge or discharge its full capacity ( $U_{Fe}=100\%$ ), while a 0.5C battery requires two hours:

$$I_{@1c} = \frac{nF}{3600 \text{ seconds}} \text{ and } I_{@0.5c} = \frac{nF}{7200 \text{ seconds}} \quad (S7)$$

Since the energy capacity of this system depends on the metal/metal oxide redox couple, utilization of metal ( $U_{Fe}$ , %) is a crucial parameter for SOIAB. They are defined by:

$$t_{Fe}^* = \frac{Q_{Fe}^*}{I_a} \quad (S8)$$

$$U_{Fe} = \frac{Q_{Fe}}{Q_{Fe}^*} = \frac{t_{Fe}}{t_{Fe}^*} \quad (S9)$$

where  $t_{Fe}^*$  is the theoretical full discharge or charge time;  $Q_{Fe}^*$  is the total theoretical charge capacity per mole Fe;  $Q_{Fe}$  and  $t_{Fe}$  are the measured charge capacity and actual discharge/charge time (seconds).

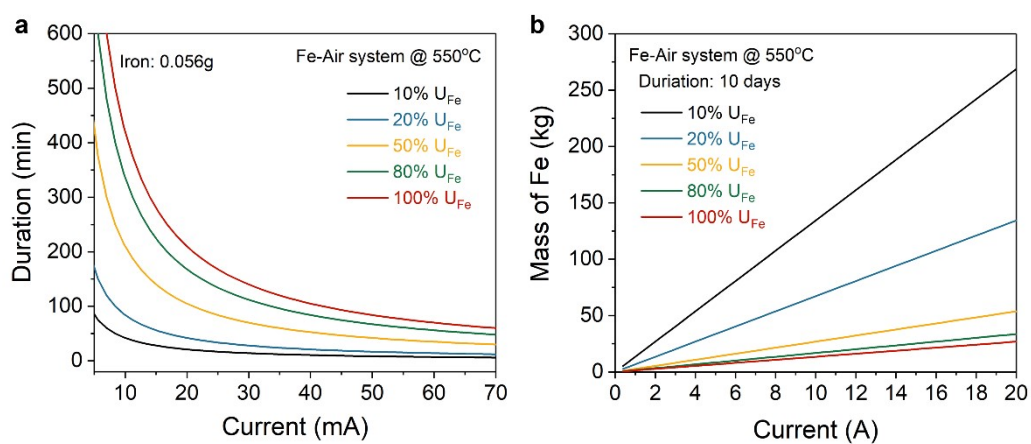

**Figure S1.** Current- $U_{Fe}$ -duration relationship. (a) Discharge/charge duration with 0.056 g Fe (used in this study)

vs.  $j$  and  $U_{Fe}$ ; (b) the mass of Fe for 10 days storage at different  $j$  and  $U_{Fe}$ .

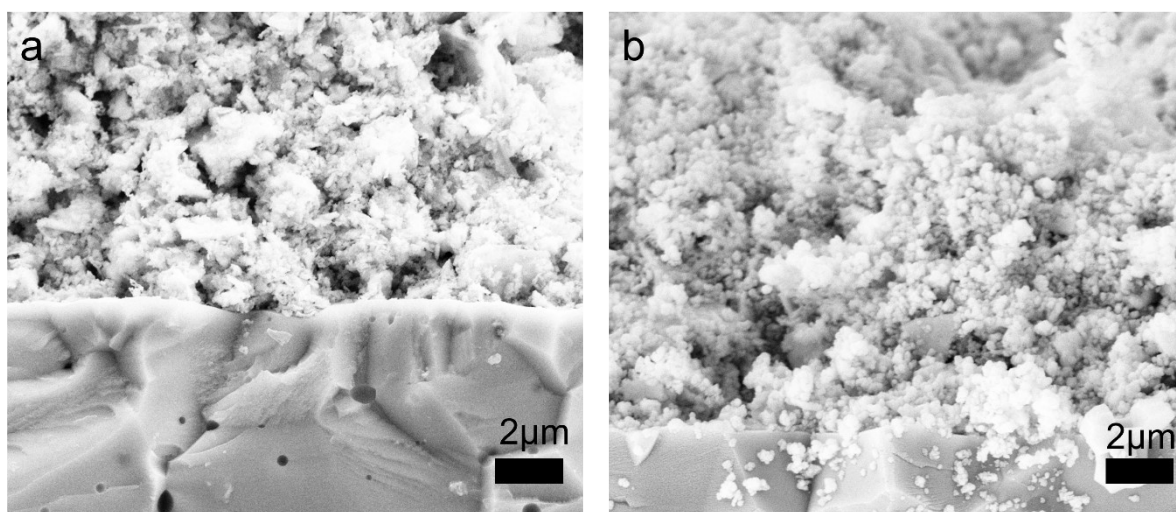

**Figure S2** SEM images of LSM/BYC OE before (a) and after (b) 250h testing at 0.2C and 550°C.

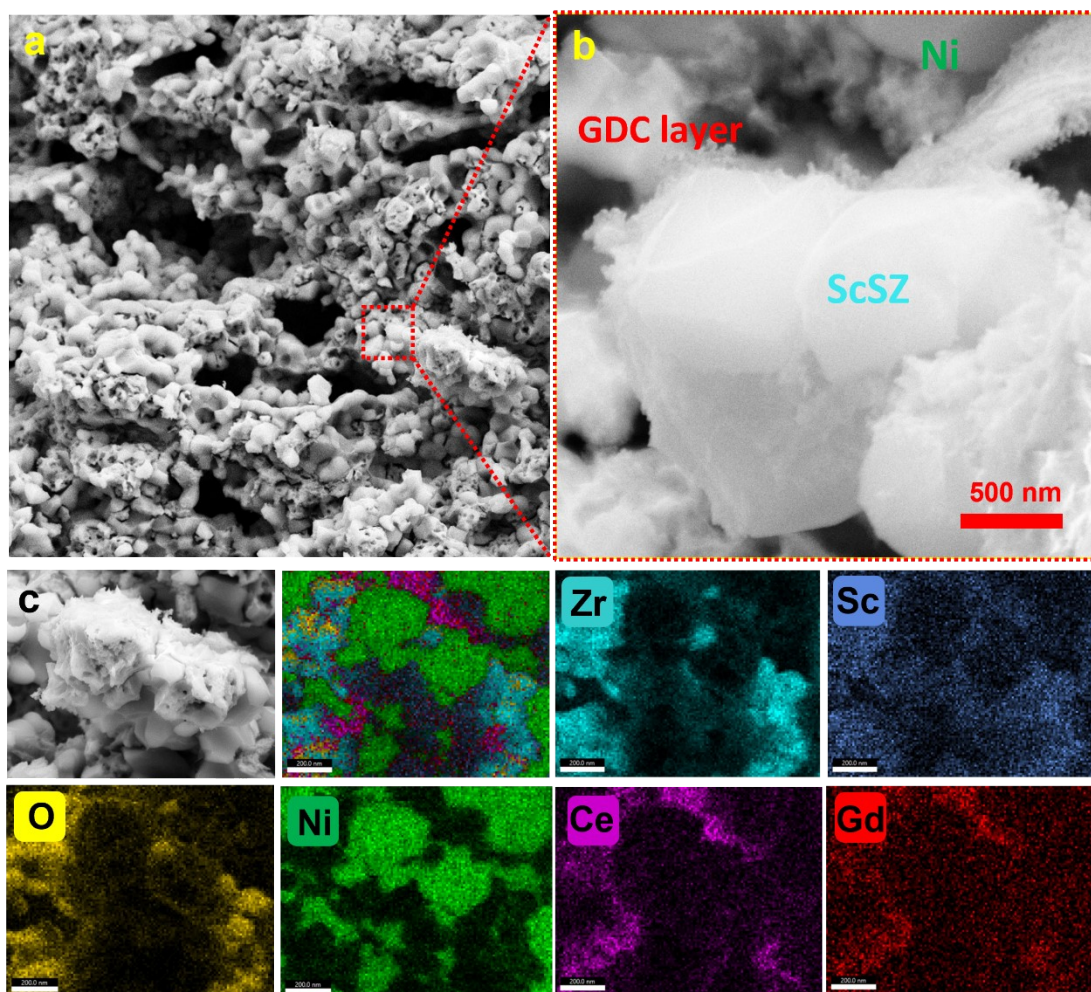

**Figure S3.** (a and b) SEM images of 4 wt% GDC infiltrated HE after reduction; (c) corresponded elemental mapping.

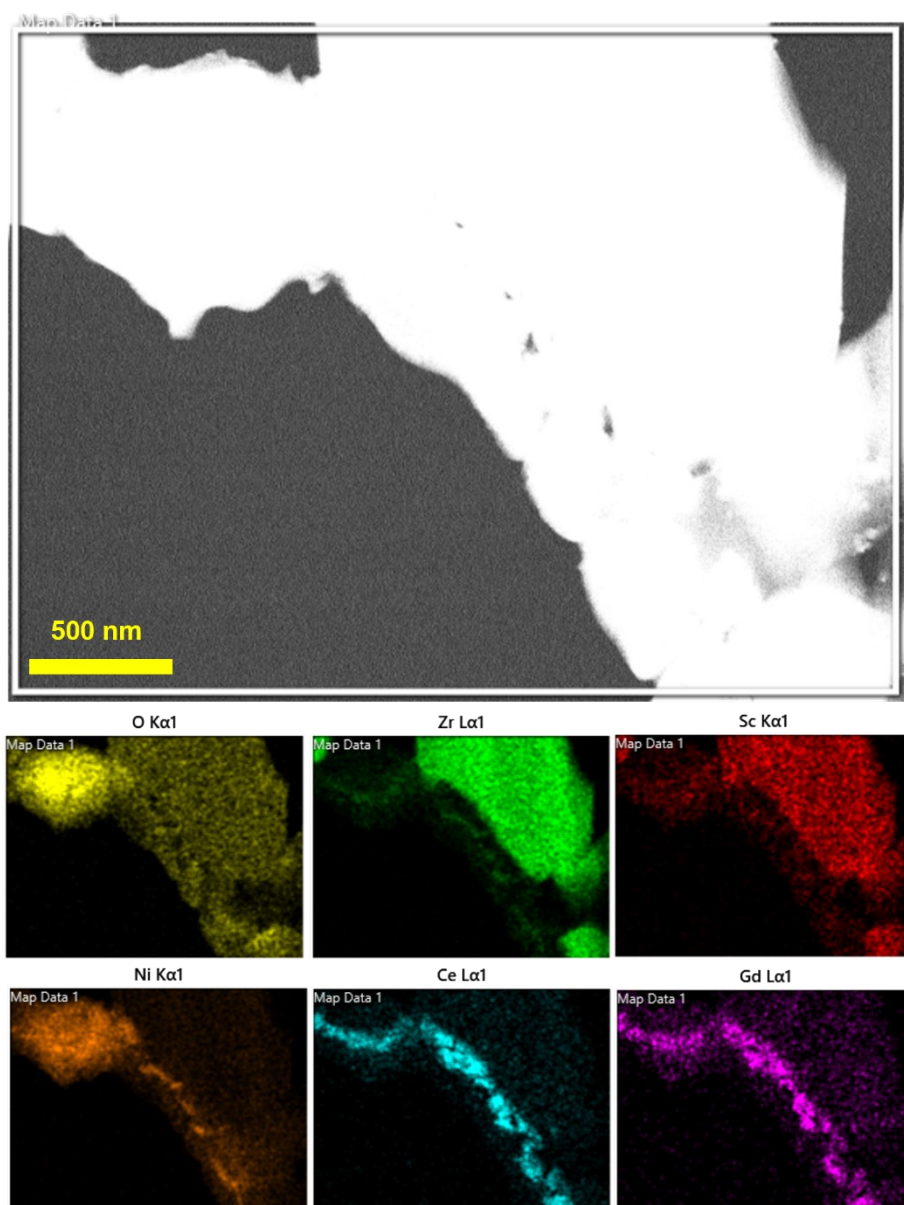

**Figure S4.** TEM image and the corresponding elemental mapping of 4 wt% GDC infiltrated HE after reduction.

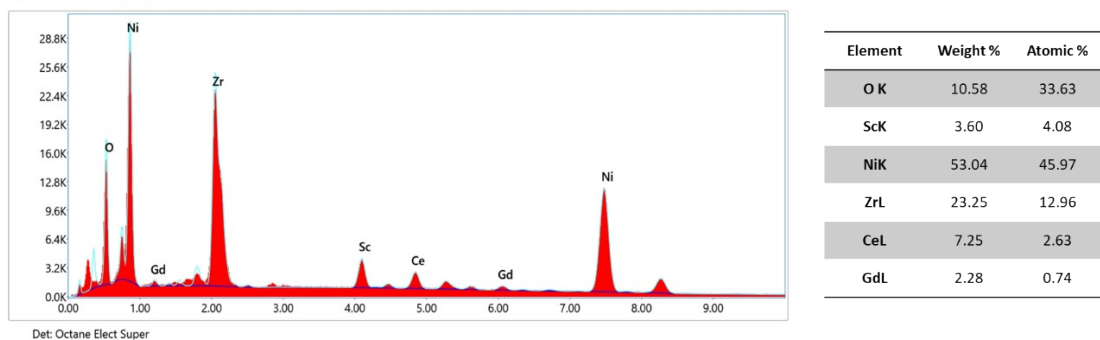

**Figure S5.** EDS spectrum and corresponding elemental contents of 4 wt% GDC infiltrated HE.

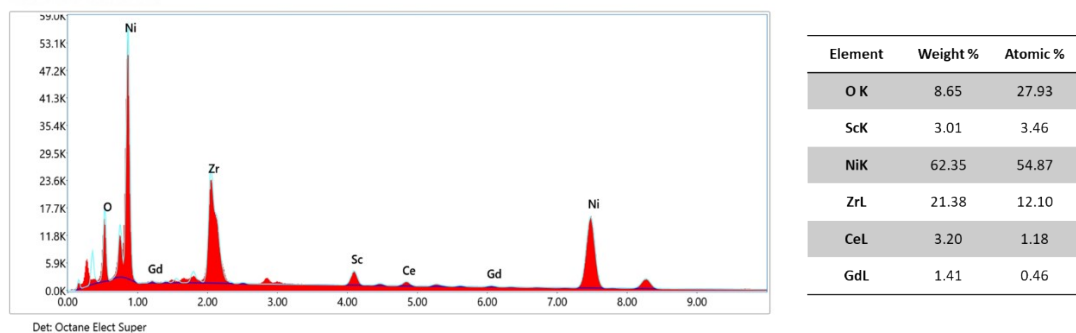

**Figure S6.** EDS spectrum and the corresponding elemental distributions of 2 wt% GDC infiltration HE.



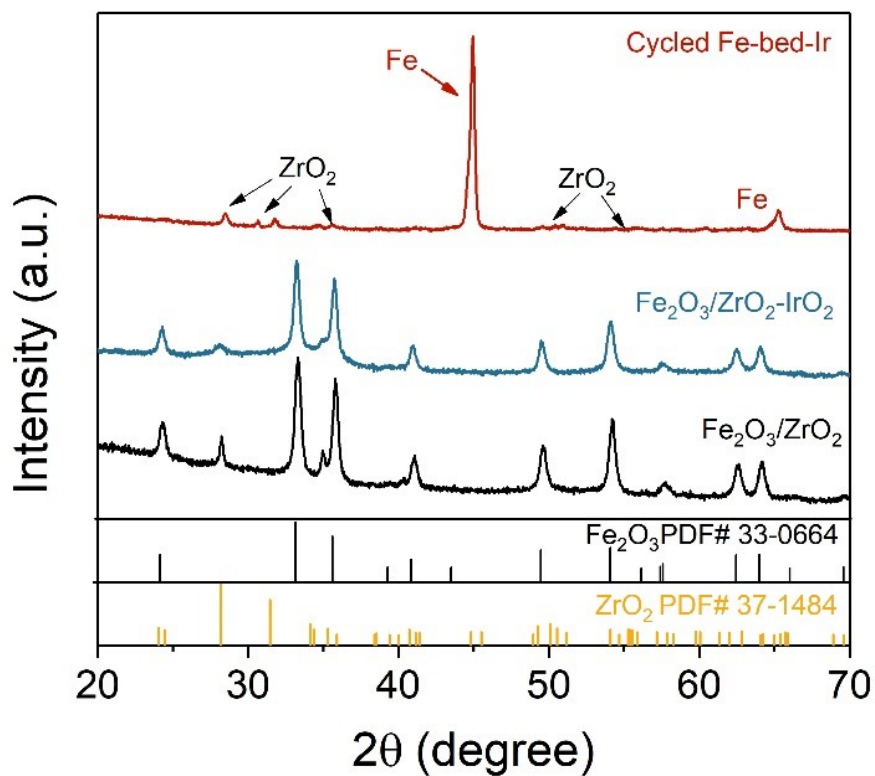

**Figure S7.** XRD pattern of as-prepared pristine Fe<sub>2</sub>O<sub>3</sub>/ZrO<sub>2</sub> (bottom) and IrO<sub>2</sub>-impregnated Fe<sub>2</sub>O<sub>3</sub>/ZrO<sub>2</sub> (medium) and corresponding cycled Fe-bed-Ir (top) at  $U_{Fe}=50\%$  and 0.2C.

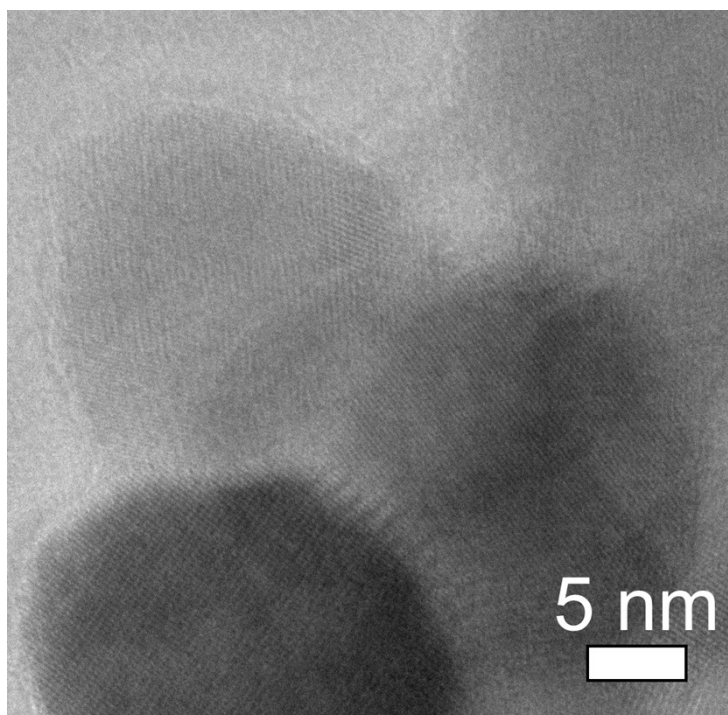

**Figure S8.** HRTEM image of a fresh Fe<sub>2</sub>O<sub>3</sub>/ZrO<sub>2</sub> sample.

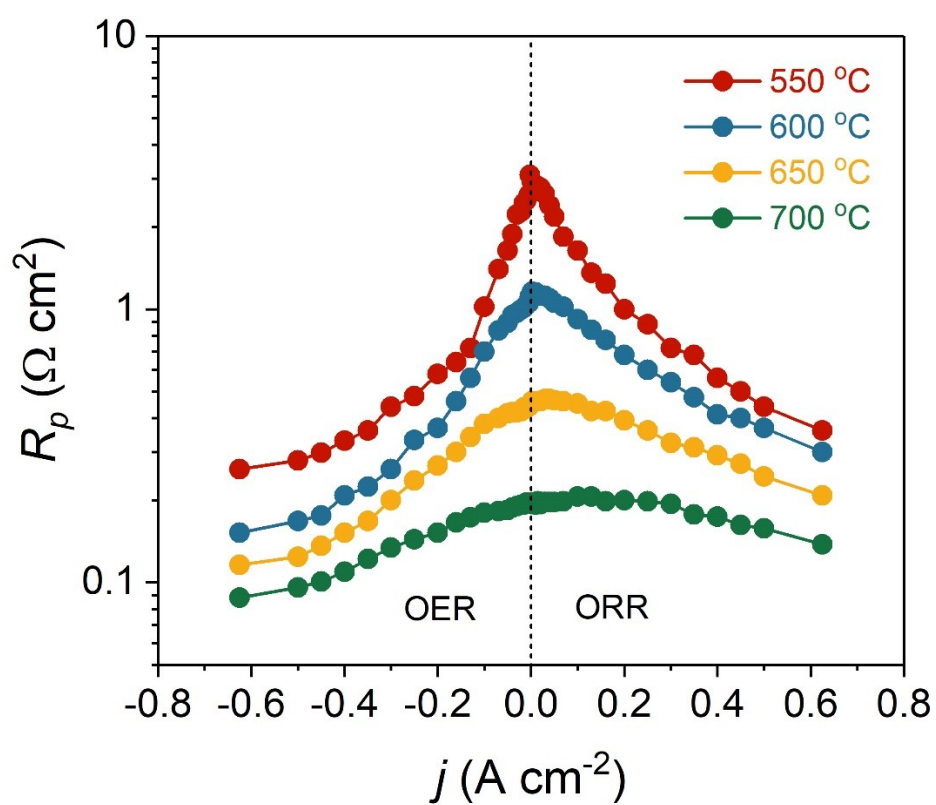

**Figure S9.**  $R_p$  of LSM/BYC OE vs.  $j$  at different temperatures.

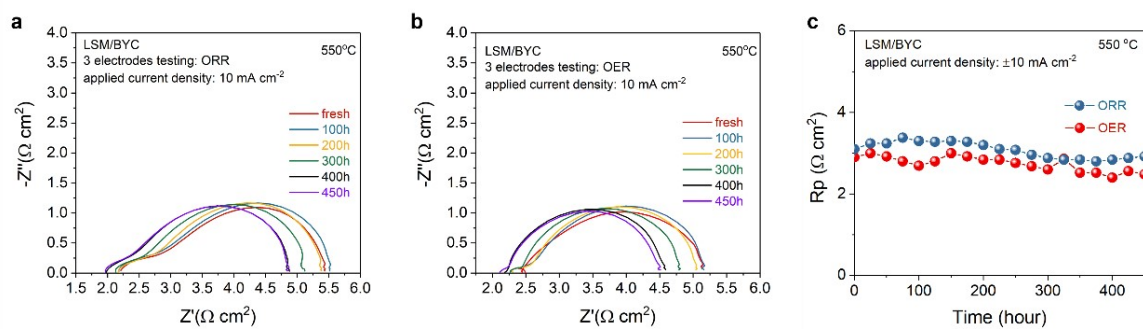

**Figure S10.** Stability of LSM/BYC OE evaluated by three-electrode symmetric cell under an applied  $j = 10 \text{ mA cm}^{-2}$ : (a) EIS spectra vs. time during ORR process; (b) EIS spectra vs. time during OER process; (c)  $R_p$  of ORR and OER vs. time.

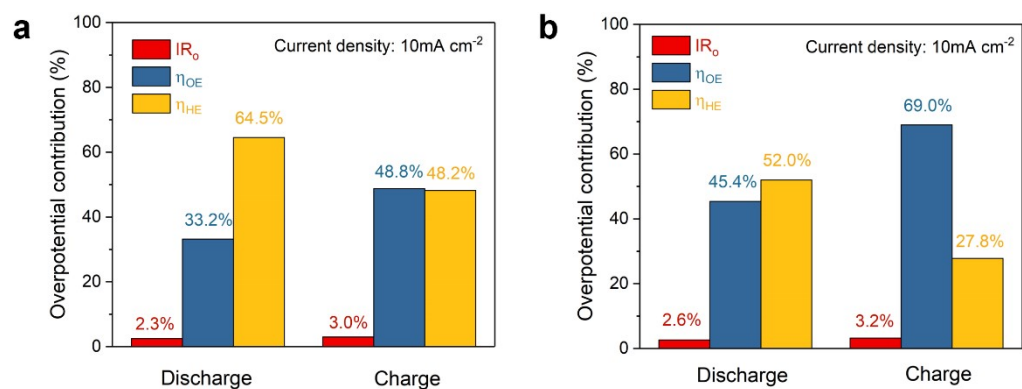

**Figure S11.** Overpotential contributions during charge and discharge process: (a) 1 wt% GDC infiltrated HE; (b) 4 wt% GDC infiltrated HE.

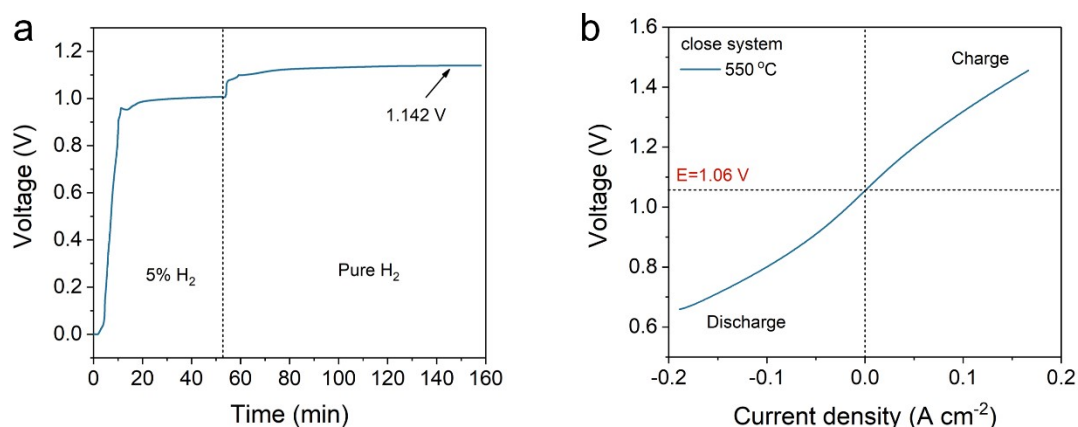

**Figure S12.** (a) OCV vs. time of RSOC in H<sub>2</sub>-3%H<sub>2</sub>O for dip-coated cells in open system; (b)  $V$ - $j$  curve of RSOC in the close system.

The performance of the SOIAB with improved RSOC and Fe<sub>3</sub>O<sub>4</sub>/ZrO<sub>2</sub>-Ir ESU material was tested at 550 °C. Figure S12a shows the variations of OCV of the cell vs. time in H<sub>2</sub>-3%H<sub>2</sub>O in open system. After full reduction, the cell exhibits a OCV of 1.144 V, which is close to the thermodynamic potential, suggesting a good gas tightness of the system. Then the performance of RSOC was tested in a closed system, where the H<sub>2</sub> inlet and outlet were closed. Figure S12b shows  $V$ - $j$  curves in both fuel cell and electrolyzer modes in the close system, where the OCV of battery is seen to decrease to ~1.06 V, the thermodynamic equilibrium voltage for Fe-Fe<sub>3</sub>O<sub>4</sub> redox couple at 550°C.

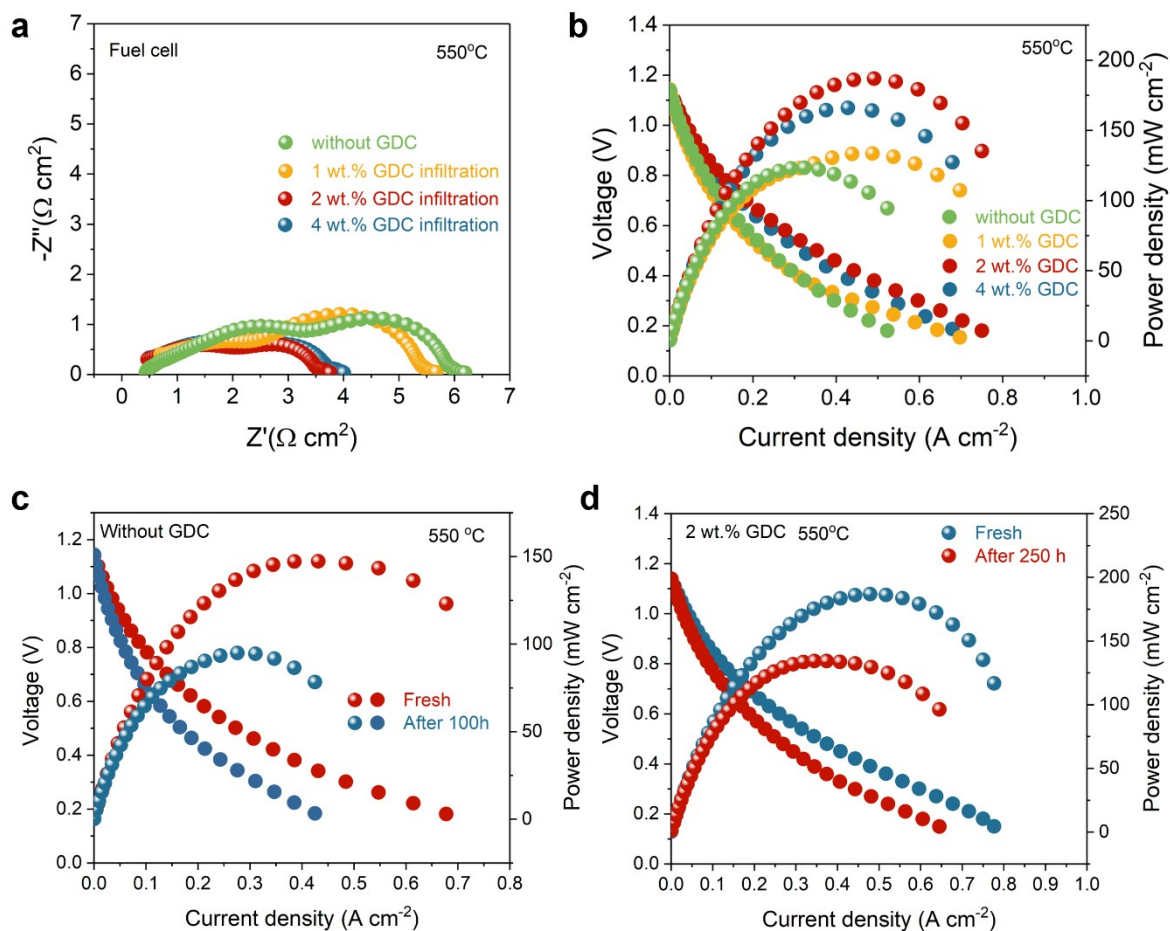

**Figure S13.** Comparison of cell performance at different GDC loadings: (a) EIS; (b) V-I and P-I curves; (c) performance of 2 wt.% GDC infiltrated cell before and after testing; (d) performance of baseline cell before and after testing.

Figure S13a summarizes the ohmic resistance ( $R_o$ ) and electrode polarization resistance ( $R_p$ ) values. The  $R_o$  remains a constant for different electrodes, while  $R_p$  decreases gradually with the GDC loading, which is attributed to the additional catalytic activity of GDC. The performance was also evaluated in a single cell. The V-j curves (Figure S13b) indicates the maximum power density reaches to 200  $\text{mA cm}^{-2}$  at 550 °C for 2 wt% GDC infiltrated cell, which has a significant improvement compared to that of baseline HE cell. However, when the GDC loading increases to 4 wt%, the performance did not show further improvement. This behavior could be attributed to the thicker GDC layer covering more active Ni particles (see

Figure 2). Therefore, 2 wt% is the optimal GDC loading. In addition, after GDC infiltration, the stability of RSOC is also improved as shown in Figure S13c and S13d.



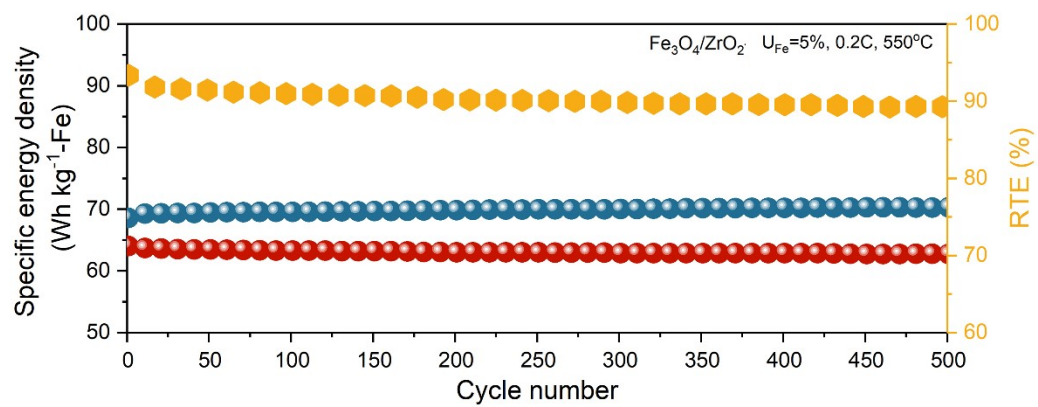

**Figure S14.** The corresponding SED and RTE of battery with Fe<sub>3</sub>O<sub>4</sub>/ZrO<sub>2</sub> ESU materials at U<sub>Fe</sub>=5% and 0.2C.

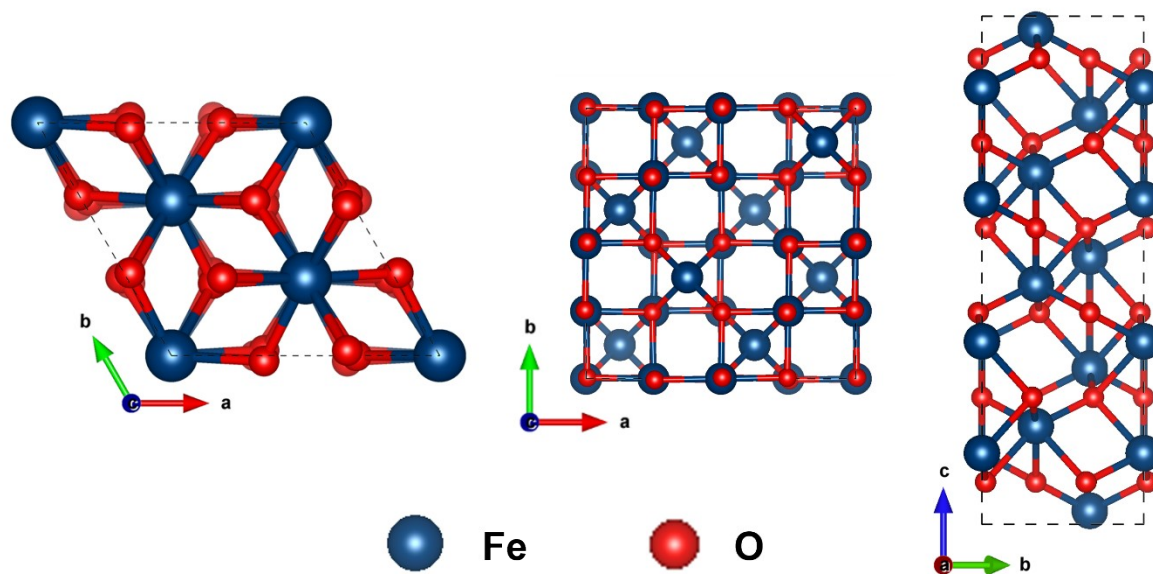

**Figure S15.** Illustrations of  $\text{Fe}_3\text{O}_4$  crystal structure in different views.

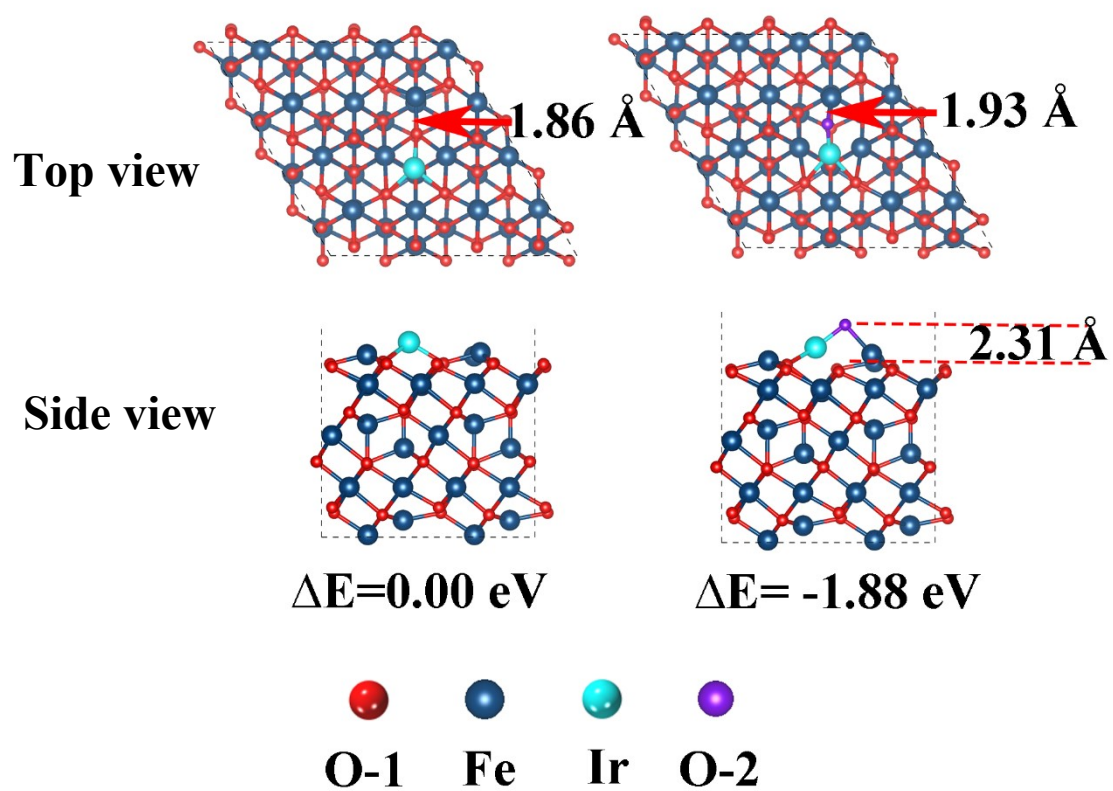

**Figure S16.** Top view and side view of two  $\text{Fe}_3\text{O}_4\text{-Ir}$  (111) surface structures along with the relative energy.

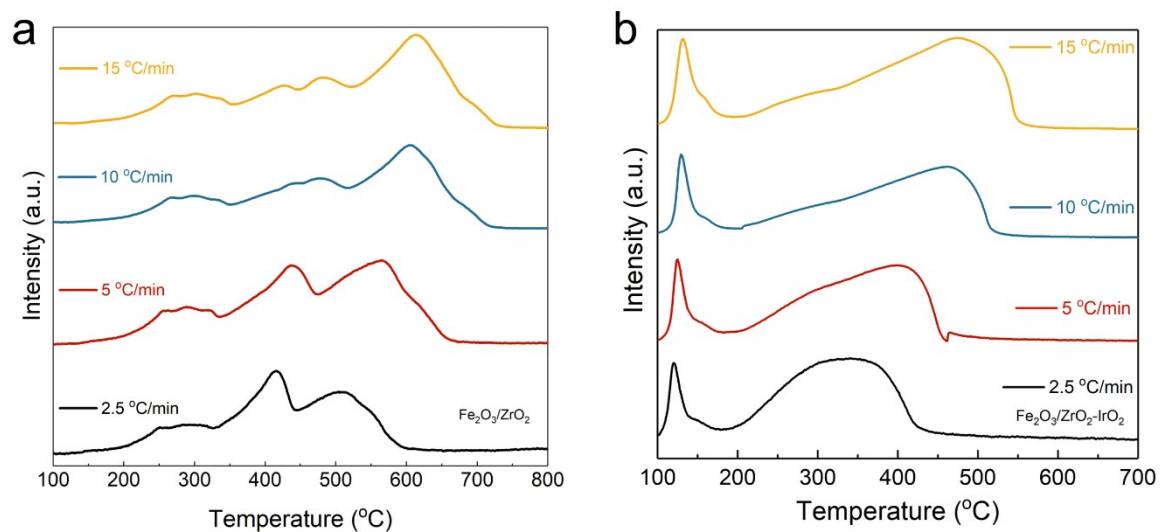

**Figure S17.** TPR profiles under different ramping rates of 2.5-15 °C/min for (a) fresh  $\text{Fe}_2\text{O}_3/\text{ZrO}_2$ ; (b) fresh  $\text{Fe}_2\text{O}_3/\text{ZrO}_2\text{-IrO}_2$ .

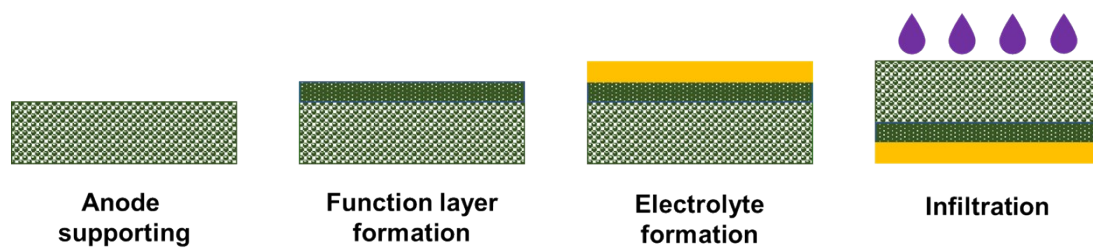

**Figure S18.** Schematic of HE-supported half-cell fabrication process including GDC infiltration.

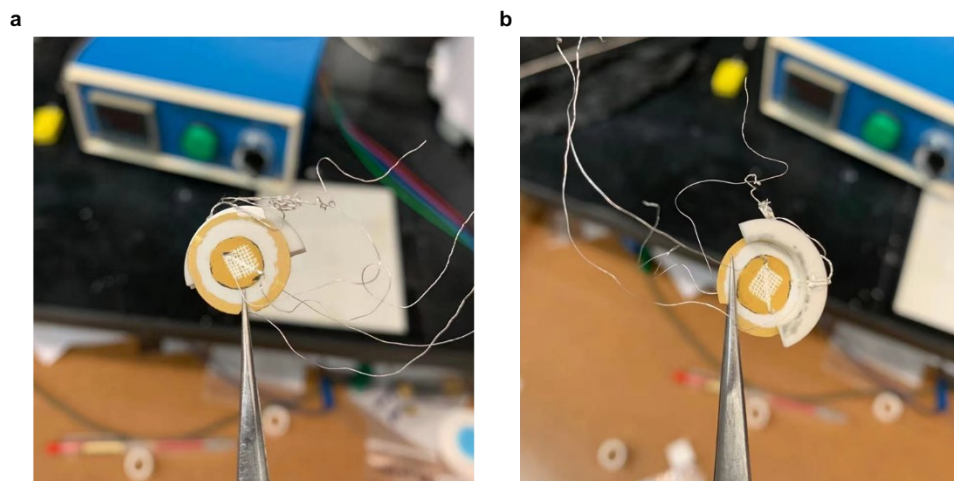

**Figure S19.** Picture of a three-electrode symmetric cell: (a) front; (b) back. Yellow: gold paste; center: Ag mesh; white: ScSZ electrolyte.

**Table S1.** Electrochemical testing protocol for SOIAB with 0.001 mol Fe-loading as an example.

| Protocol of Cell Testing |                            |                 |        |        |        |        |        |        |        |        |        |        |        |
|--------------------------|----------------------------|-----------------|--------|--------|--------|--------|--------|--------|--------|--------|--------|--------|--------|
| 1                        | Testing temperature        |                 |        |        |        |        |        |        |        |        |        |        |        |
| 2                        | Glass powder melting       |                 |        |        |        |        |        |        |        |        |        |        |        |
| 3                        | OCV during reduction       |                 |        |        |        |        |        |        |        |        |        |        |        |
| 4                        | 5% Hydrogen reduction      |                 |        |        |        |        |        |        |        |        |        |        |        |
| 5                        | Pure hydrogen reduction    |                 |        |        |        |        |        |        |        |        |        |        |        |
| 6                        | V-i curve for open system  |                 |        |        |        |        |        |        |        |        |        |        |        |
| 7                        | EIS for open system        |                 |        |        |        |        |        |        |        |        |        |        |        |
| 8                        | OCV between open and close |                 |        |        |        |        |        |        |        |        |        |        |        |
| 9                        | V-i curve for close system |                 |        |        |        |        |        |        |        |        |        |        |        |
| 10                       | EIS for close system       |                 |        |        |        |        |        |        |        |        |        |        |        |
| 11                       | Rate performance at 10%    | Rate            | 0.1C   | 0.2C   | 0.4C   | 0.5C   | 0.6C   | 0.8C   | 0.1C   |        |        |        |        |
| 12                       |                            | Current         | 0.007A | 0.014A | 0.028A | 0.035A | 0.042A | 0.056A | 0.007A |        |        |        |        |
| 13                       |                            | Time            | 3600s  | 1800s  | 900s   | 720s   | 600s   | 450s   | 3600s  |        |        |        |        |
| 14                       |                            |                 |        |        |        |        |        |        |        |        |        |        |        |
| 15                       | Utilization testing        | U <sub>Fe</sub> | 5.00%  | 10%    | 20%    | 30%    | 40%    | 50%    | 60%    | 70%    | 80%    | 90%    | 100%   |
| 16                       |                            | Current         | 0.014A |
| 17                       |                            | Time            | 900s   | 1800s  | 3600s  | 5400s  | 7200s  | 9000s  | 10800s | 12600s | 14400s | 16200s | 18000s |
| 18                       |                            |                 |        |        |        |        |        |        |        |        |        |        |        |
| 19                       | Cycling performance        | U <sub>Fe</sub> | 5.00%  | 20%    | 50%    |        |        |        |        |        |        |        |        |
| 20                       |                            | Current         | 0.014A | 0.014A | 0.028A |        |        |        |        |        |        |        |        |
| 21                       |                            | Time            | 900s   | 3600s  | 4500s  |        |        |        |        |        |        |        |        |
| 22                       |                            | n               | 500    | 100    | 100    |        |        |        |        |        |        |        |        |
| 23                       |                            |                 |        |        |        |        |        |        |        |        |        |        |        |

## References

- [1]. Zhang, C.; Ji, C.; Wang, W.; Schmidt, D.; Jin, X.; Lemmon, J. P.; Huang, K., *Energy Environ. Sci.* **2016**, 9 (12), 3746-3753.
